# Supplementary material for: Hydrothermal synthesis of nitrogen-doped carbon quantum dots from lignin for formaldehyde determination
Source: Royal Society of Chemistry journal article supplement (doi:10.1039/d1ra05370a), 2021-01-01
Supplement: d1ra05370a1.pdf [file d1ra05370a1.pdf]

# **Hydrothermal synthesis of nitrogen-doped carbon quantum dots from lignin for formaldehyde determination**

*Ying Wang, Yushan Liu, Jin Zhou, Jinquan Yue, Mingcong Xu,  
Bang An, Chunhui Ma, Wei Li\*, Shouxin Liu\**

Key Laboratory of Bio-based Material Science & Technology (Northeast Forestry University), Ministry of Education, Harbin 150040, P. R. China

\*E-mail: Wei Li, [liweil19820927@126.com](mailto:liweil19820927@126.com) and Shouxin Liu, [liushouxin@126.com](mailto:liushouxin@126.com)

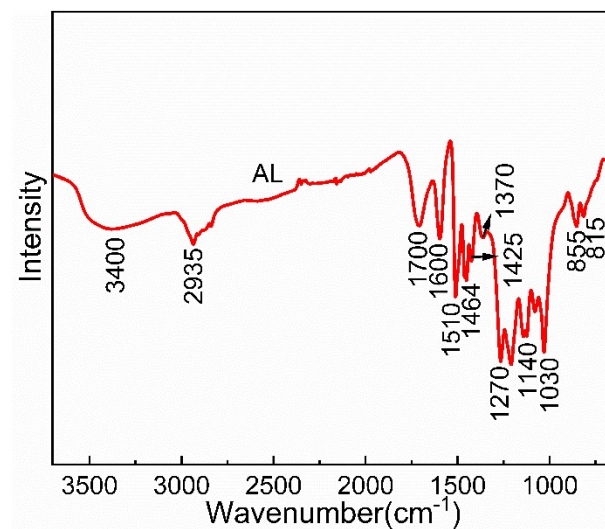

**Fig. S1** FT-IR spectra of AL.

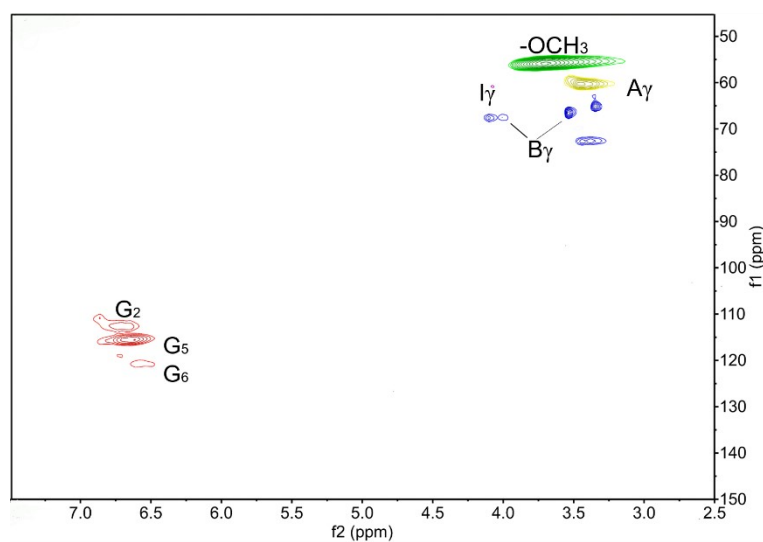

**Fig. S2.** 2D-HSQC spectra of AL.

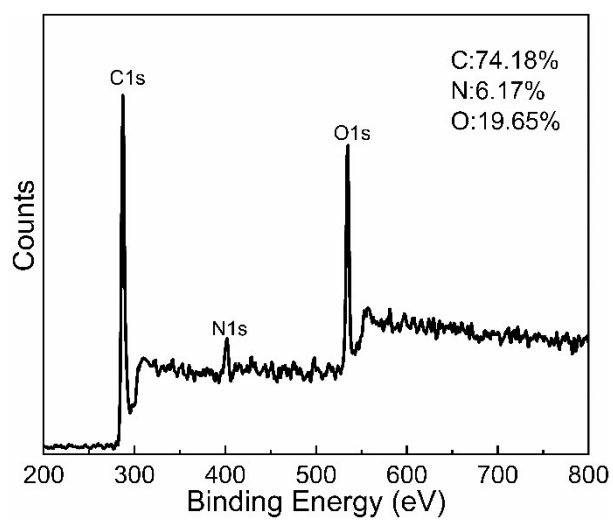

**Fig. S3.** XPS full-scan spectrum of the NCQDs.

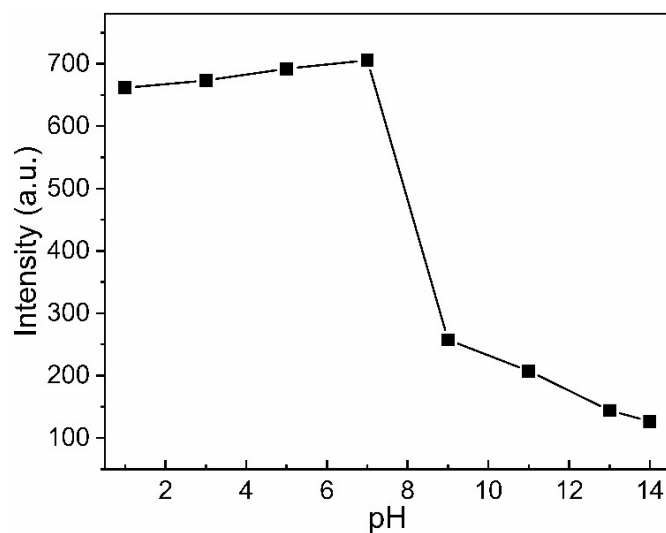

**Fig. S4.** PL intensity of CQDs at different pH values.

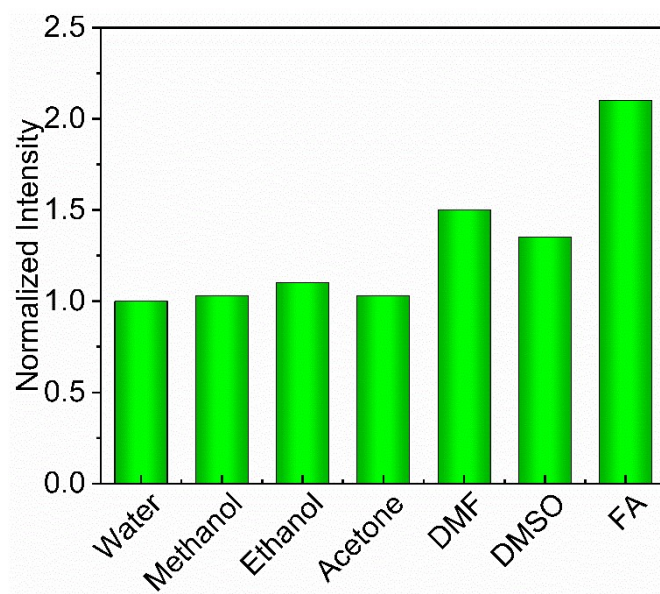

**Fig. S5.** The normalized FL intensity of the NCQDs in the presence of a range of solvent.

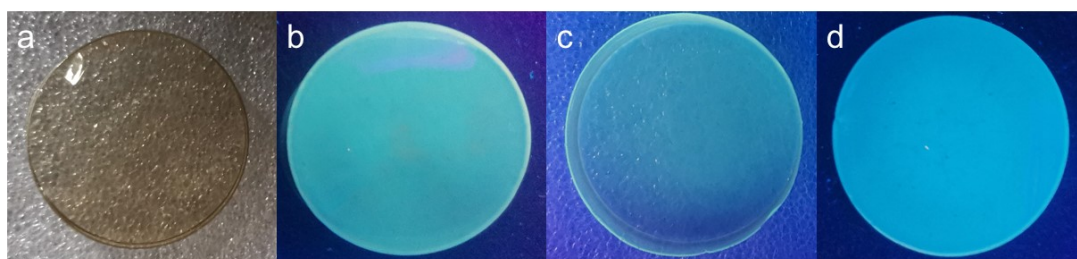

**Fig. S6.** (a) The digital photograph NCQDs/PVA composite film; from b to d is digital photograph of NCQDs/PVA composite film under initial conditions upon, treated with normal air and FA gas under a 365 nm UV light, respectively.

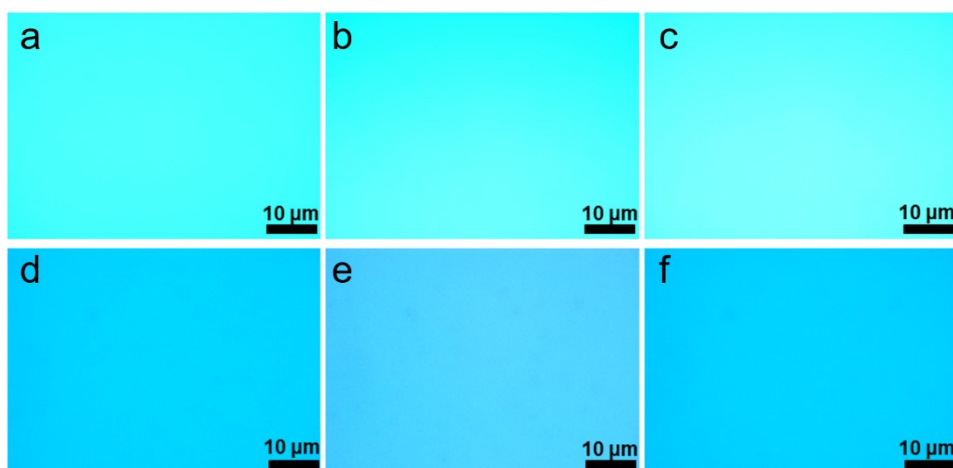

**Fig. S7.** The digital photograph NCQDs/PVA composite film under treated with normal air (a, b and c) and FA gass (d, e and f) under a 365 nm UV light, respectively.

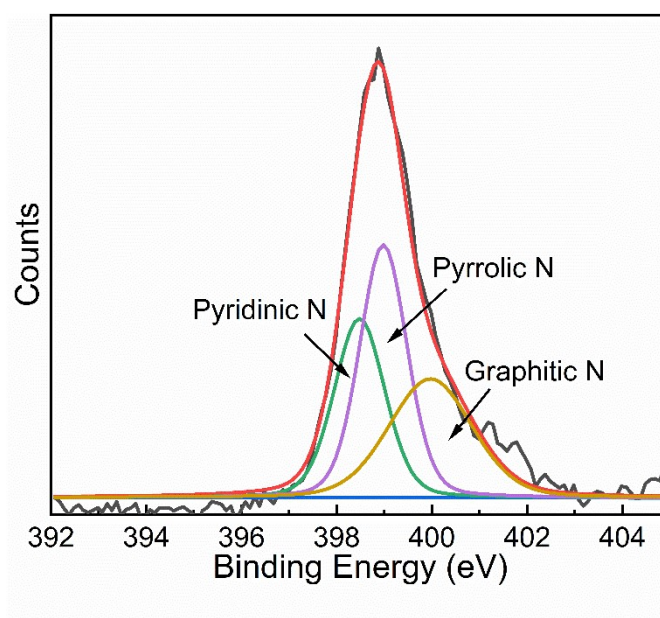

**Fig. S8.** The high-resolution N1s peak of NCQDs-FA.

**Table S1** The molecular weight and dispersion of AL

| samples | $M_w(\text{g/mol})$ | $M_n(\text{g/mol})$ | $M_w/M_n$ |
|---------|---------------------|---------------------|-----------|
| AL      | 11209               | 4538                | 2.47      |

**Table S2** Functional group assignments for AL from FT-IR spectra

| Functional group                                                    | Wavenumber (cm <sup>-1</sup> )                                          |
|---------------------------------------------------------------------|-------------------------------------------------------------------------|
| Stretching vibration of O-H in hydroxyl                             | 3400 cm <sup>-1</sup> ,                                                 |
| Stretching vibration of aromatic nucleus conjugated C=O             | 1700 cm <sup>-1</sup>                                                   |
| Absorption bands of aromatic rings                                  | 1600 cm <sup>-1</sup> , 1510 cm <sup>-1</sup> ,<br>1425cm <sup>-1</sup> |
| Stretching vibration of C=C                                         | 1464 cm-1                                                               |
| Stretching vibration of Ac-OH on aromatic nucleus                   | 1370 cm <sup>-1</sup>                                                   |
| Stretching vibration of C-O in Guaiacyl structural units            | 1270 cm-1                                                               |
| Stretching vibration of C-H in Guaiacyl structural units            | 1140 cm <sup>-1</sup>                                                   |
| In-plane deformation vibration of C-H on aromatic nuclei            | 1030 cm <sup>-1</sup>                                                   |
| Out-plane deformation vibration of C-H in Guaiacyl structural units | 855 cm <sup>-1</sup> , 815 cm <sup>-1</sup>                             |

**Table S3** Assignment of <sup>13</sup>C-<sup>1</sup>H cross-signals in the 2D-HSQC spectra of AL

| label             | δ <sub>C</sub> /δ <sub>H</sub> (ppm) | assignment                                                  |
|-------------------|--------------------------------------|-------------------------------------------------------------|
| -OCH <sub>3</sub> | 55.2/3.5                             | C-H in methoxyls                                            |
| A <sub>γ</sub>    | 60.1/3.4                             | C <sub>γ</sub> -H <sub>γ</sub> in β-O-4' substructures (A)  |
| B <sub>γ</sub>    | 65.4-71.4/3.4-4.1                    | C <sub>γ</sub> -H <sub>γ</sub> in resinol substructures (B) |
| G <sub>2</sub>    | 110.9/6.75                           | C <sub>2</sub> -H <sub>2</sub> in guaiacyl units (G)        |
| G <sub>5</sub>    | 115.6/6.66                           | C <sub>5</sub> -H <sub>5</sub> in guaiacyl units (G)        |
| G <sub>6</sub>    | 120.7/6.54                           | C <sub>6</sub> -H <sub>6</sub> in guaiacyl units (G)        |

**Table S4** XPS data analysis of N1s spectra of samples

| samples  | pyridinic N | pyrrolic N | graphitic N |
|----------|-------------|------------|-------------|
| NCQDs    | 0.22        | 0.42       | 0.36        |
| NCQDs-FA | 0.32        | 0.34       | 0.34        |
